# Supplementary material for: Extensional reactivation of the Penninic Frontal Thrust 3 Ma ago as evidenced by U-Pb dating on calcite in fault zone cataclasite
Source: Copernicus journal article supplement (doi:10.5194/se-2020-119), 2020-09-02
Supplement: Supplementary file 1 [file se-2020-119_Suppl. Mat. 2 U-Pb results.xlsx]

## Sheet: Feuille1
Suppl. Mat. 2. U/Pb LA-ICPMS data
Date 20/11/19	Name	238U	206Pb	207Pb	238U	2σ	207Pb	2σ
Spot Number		(cps)	(cps)	(cps)	206Pb	(%)	206Pb	(%)
1	NIST614-001	121200	91780	79720	1.2743	1.06141	0.870447	0.827586
2	NIST614-002	124200	93000	81180	1.29168	1.19671	0.871247	0.792375
25	NIST614-003	129000	96970	84030	1.28685	1.27628	0.869446	1.26582
26	NIST614-004	130800	96230	83290	1.31584	1.32159	0.868046	1.14108
49	NIST614-005	112500	86190	75400	1.26367	1.07034	0.87595	0.719589
50	NIST614-006	124600	93330	81570	1.28975	1.04869	0.875349	0.811521
73	NIST614-007	126000	94500	82330	1.29265	1.34529	0.871647	0.677227
74	NIST614-008	123800	92220	80060	1.29652	0.968703	0.867545	0.761158
97	NIST614-009	119400	90860	78820	1.2714	1.21581	0.868946	0.782959
98	NIST614-010	114100	85620	74580	1.28782	1.05026	0.872348	0.848721
121	NIST614-011	134800	100440	87370	1.29845	1.11607	0.871347	0.895625
122	NIST614-012	130000	97080	84460	1.29555	1.34228	0.870147	0.781879
3	WC1-001	945800	41310	5770	22.0949	0.699606	0.139972	1.57255
4	WC1-002	1013900	43860	6170	22.3654	0.863931	0.142073	1.83099
27	WC1-003	730200	31680	3730	22.52	1.4586	0.118061	2.88136
28	WC1-004	972800	41260	5480	22.8484	0.718816	0.132968	1.95636
51	WC1-005	676600	28850	3096	22.6745	0.937367	0.108256	2.49538
52	WC1-006	965300	43010	6500	21.776	0.931677	0.150577	2.12625
75	WC1-007	812000	37420	5330	21.0128	1.01149	0.142673	2.24404
76	WC1-008	678900	26940	3470	24.4039	0.989707	0.129066	2.32558
99	WC1-009	837100	37340	4894	21.6601	0.892061	0.131768	1.97418
100	WC1-010	824900	36200	4599	22.0272	0.921053	0.127065	2.04724
124	WC1-012	698300	30930	3960	21.7567	0.932504	0.127465	2.1978
123	WC1-011	864800	38090	5430	21.9016	1.10278	0.141673	2.33051
5	FP18-3B-001	1027900	5700	4390	192.255	6.53266	0.771396	3.63165
6	FP18-3B-002	1193500	3510	2500	335.239	3.7464	0.722371	3.4626
7	FP18-3B-003	567500	24830	20420	22.2591	2.17014	0.824423	1.20146
8	FP18-3B-004	653900	6670	5340	95.8378	2.21774	0.805413	2.36025
9	FP18-3B-005	763000	10800	8740	68.8834	2.38429	0.812417	1.72414
10	FP18-3B-006	1419800	4560	3240	303.261	2.26187	0.715367	2.7972
11	FP18-3B-007	796100	31870	26010	24.1334	0.880705	0.81842	1.10024
12	FP18-3B-008	1112200	30040	24290	35.9005	1.34553	0.810416	1.35802
13	FP18-3B-009	1227000	15170	12150	79.2208	2.31707	0.802412	1.62095
14	FP18-3B-010	942500	15350	12500	61.058	3.00633	0.813418	1.47601
15	FP18-3B-011	333900	56100	46200	6.12512	5.83596	0.823022	1.05762
16	FP18-3B-012	440800	63120	52300	6.73377	1.57819	0.829826	0.892211
17	FP18-3B-013	757300	30470	25080	24.143	2.0008	0.822322	1.15586
18	FP18-3B-014	862600	25480	20840	32.8766	1.43991	0.819921	1.09823
19	FP18-3B-015	1846000	16720	13250	107.528	1.7071	0.794408	1.38539
20	FP18-3B-016	315200	67000	55400	4.61799	2.51046	0.829025	0.796524
21	FP18-3B-017	463400	46590	38490	9.65141	1.8018	0.827725	1.01535
22	FP18-3B-018	716500	11820	9480	59.1257	1.63399	0.808415	1.9802
23	FP18-3B-019	1197400	7110	5410	163.659	1.4758	0.765393	2.22222
24	FP18-3B-020	1260000	4850	3620	259.883	4.08922	0.75939	2.50329
29	FP18-3B-021	626200	12630	10020	48.2087	2.20441	0.79841	2.25564
30	FP18-3B-022	305500	30200	24920	10.1055	4.0153	0.822422	1.3382
31	FP18-3B-023	512200	20280	16330	24.6744	1.3704	0.810416	1.23457
32	FP18-3B-024	494200	63000	51810	7.67089	1.88917	0.822822	0.911965
33	FP18-3B-025	470100	80110	66210	5.67878	1.08881	0.828025	0.77332
34	FP18-3B-026	462300	107300	88760	4.17455	1.08771	0.828725	0.700229
35	FP18-3B-027	418000	141400	116900	2.87224	2.82543	0.827625	0.701161
36	FP18-3B-028	432900	165900	137400	2.54086	1.74905	0.828225	0.531529
37	FP18-3B-029	33390	44190	36620	0.732309	1.58311	0.830226	1.04845
38	FP18-3B-030	1855000	7810	5900	248.289	5.05837	0.758389	2.37467
39	FP18-3B-031	1999000	4450	3180	433.782	3.78619	0.724372	5.93923
40	FP18-3B-032	739400	3770	2840	197.376	4.79687	0.762391	2.62467
41	FP18-3B-033	597400	5940	4760	98.0599	2.06897	0.805413	2.1118
42	FP18-3B-034	754000	52020	42610	14.0665	1.0989	0.820321	0.841566
43	FP18-3B-035	322000	16190	13000	19.2835	1.25251	0.804413	1.36816
44	FP18-3B-036	624000	24660	20020	24.8386	3.46169	0.813918	1.19238
45	FP18-3B-037	848800	4930	3860	167.523	2.65283	0.783402	3.19285
46	FP18-3B-038	1540600	9630	7390	155.93	1.98265	0.764392	1.83246
47	FP18-3B-039	460700	3720	2960	135.448	5.84879	0.811416	3.20592
48	FP18-3B-040	371800	28200	23160	13.2743	3.93013	0.822122	1.15614
53	FP18-3B-041	306900	32710	27020	9.12971	2.01058	0.828925	1.05009
54	FP18-3B-042	1512000	3045	2021	494.647	3.71094	0.672345	3.57143
55	FP18-2B-001	467100	15640	13050	29.4469	3.01837	0.830426	2.40964
56	FP18-2B-002	1043200	19430	15430	52.0345	1.13257	0.800411	1.5
57	FP18-2B-003	319300	48640	40280	6.34442	1.23344	0.827425	1.20919
58	FP18-2B-004	260700	81100	67010	3.1128	0.993172	0.830126	1.01241
59	FP18-2B-005	209700	61250	50530	3.31375	1.45773	0.828425	1.3285
60	FP18-2B-006	109800	131800	110150	0.803898	0.985458	0.83733	0.657187
61	FP18-2B-007	348000	54310	44900	6.18308	1.875	0.826624	1.19826
62	FP18-2B-008	317300	45700	37880	6.70285	0.922456	0.828425	1.20773
63	FP18-2B-009	360600	189800	156930	1.83657	1.05208	0.827825	0.894368
64	FP18-2B-010	721100	895300	744000	0.778586	0.781735	0.831727	0.637556
65	FP18-2B-011	333600	56700	47070	5.72901	1.85497	0.833528	1.00828
66	FP18-2B-012	573200	656000	541900	0.844377	0.881007	0.827225	0.955491
67	FP18-2B-013	412500	27730	22950	14.337	2.08895	0.836429	1.91388
68	FP18-2B-014	621300	685000	566600	0.876356	0.948076	0.828225	0.918096
69	FP18-2B-015	478700	25880	21140	17.9116	1.24056	0.81842	1.58924
70	FP18-2B-016	444300	5840	4650	73.5207	3.02234	0.793407	4.28752
71	FP18-2B-017	337100	5190	4140	63.28	2.74809	0.804413	3.85572
72	FP18-2B-018	11090	14250	11780	0.754529	7.42638	0.830426	2.40964
77	FP18-2B-019	435000	233900	192400	1.79986	1.23457	0.823423	1.09356
78	FP18-2B-020	134300	28920	23680	4.50206	1.1588	0.824423	1.33495
79	FP18-2B-021	174800	11340	9320	14.9167	1.87824	0.822422	2.18978
80	FP18-2B-022	246500	70810	58780	3.36495	1.0623	0.831727	1.08264
81	FP18-2B-023	112400	27370	22690	4.00934	2.6506	0.832427	1.32212
82	FP18-2B-024	180300	383600	316900	0.454553	1.25399	0.826624	0.472041
83	FP18-2B-025	316000	35800	30000	8.80123	6.25686	0.827425	1.81378
84	FP18-2B-026	296100	21690	17810	13.2067	1.46306	0.823423	1.57959
85	FP18-2B-027	50500	47800	39100	1.0347	2.42764	0.825424	1.33333
86	FP18-2B-028	242100	192500	159400	1.2144	0.875099	0.829025	0.712044
87	FP18-2B-029	366300	555800	458900	0.639563	1.14804	0.826424	0.641647
88	FP18-2B-030	33010	18700	15480	1.72547	2.74356	0.833428	1.92077
89	FP18-2B-031	638300	751000	622700	0.827857	0.898588	0.828725	0.386333
90	FP18-2B-032	98800	47100	39100	2.04621	1.84136	0.830326	1.03627
91	FP18-2B-033	121700	209600	172700	0.561211	1.03288	0.825023	0.497211
92	FP18-2B-034	149800	234400	193100	0.618985	0.936476	0.826224	0.520707
93	FP18-2B-035	18860	105400	87340	0.17303	1.89838	0.830026	0.626808
94	FP18-2B-036	379900	211000	174400	1.73899	0.888889	0.828125	0.531594
95	FP18-2B-037	488900	414900	342900	1.1401	0.550801	0.826724	0.471984
96	FP18-2B-038	371500	553000	456800	0.649031	0.625186	0.826724	0.447779
101	FP18-2B-039	46200	20200	17000	2.26262	2.8181	0.832427	1.5625
102	FP18-2B-040	643100	234900	193900	2.65293	1.38383	0.824923	0.485142
103	FP18-2B-041	815000	185900	153300	4.28951	2.7027	0.826424	0.690073
Date 25/11/19	Name	238U	206Pb	207Pb	238U	2σ	207Pb	2σ
Spot Number		(cps)	(cps)	(cps)	206Pb	(%)	206Pb	(%)
22	NIST614-003	111300	85800	75000	1.26197	1	0.874745	0.891327
23	NIST614-004	104200	81900	71550	1.23576	1.02121	0.872246	0.79074
46	NIST614-005	101300	80200	69700	1.22411	1.26883	0.866649	1.26874
47	NIST614-006	99560	78150	68070	1.23576	1.02121	0.872046	1.12334
70	NIST614-007	97400	77200	67040	1.22217	0.953137	0.868548	1.02428
71	NIST614-008	94400	75240	65500	1.22022	1.03421	0.871846	1.07773
1	WC1-002	836200	36470	4121	22.2591	1.00305	0.112854	1.94863
24	WC1-003	921000	36790	3791	24.3074	0.798722	0.103358	1.93424
25	WC1-004	665000	28780	3040	22.4145	1.12603	0.104358	3.16092
48	WC1-005	860200	35990	3940	22.7542	3.45563	0.109955	11.8182
49	WC1-006	755000	32490	2845	22.5504	0.860956	0.0877644	2.61959
72	WC1-007	415600	17660	2280	22.929	1.27011	0.129847	3.31024
73	WC1-008	351300	15340	2366	22.2883	1.17596	0.153738	3.05592
2	FP18-3A-001	819000	26820	21820	29.8601	2.53576	0.816369	1.18771
3	FP18-3A-002	619000	28290	23040	21.9291	3.71846	0.820567	1.19381
4	FP18-3A-003	520800	45600	38250	11.2121	3.37662	0.832962	1.02004
5	FP18-3A-004	406000	29210	24070	13.5516	1.14613	0.824666	1.21212
6	FP18-3A-005	454200	26760	21960	16.5803	1.40515	0.825965	1.1376
7	FP18-3A-006	957000	24030	19640	38.7424	1.80406	0.816669	1.22399
8	FP18-3A-007	678800	45800	38100	15.1048	4.30591	0.829464	0.903832
9	FP18-3A-008	482100	35620	28990	13.1439	1.25554	0.81367	1.01966
10	FP18-3A-009	846800	45570	37410	18.1044	1.01877	0.820467	0.86501
11	FP18-3A-010	1052000	22990	18760	44.5183	1.43916	0.818668	1.5873
12	FP18-3A-011	1073000	4000	2570	346.555	6.44258	0.726705	5.91472
13	FP18-3A-012	596000	1790	1330	339.76	6.85714	0.754694	7.28477
14	FP18-3A-013	1423000	9890	7800	140.175	2.00831	0.78968	2.78481
15	FP18-3A-014	1789000	12650	9910	146	4.72074	0.783682	1.91327
16	FP18-3A-015	1234000	11700	9300	121.925	5.57325	0.803674	1.86567
17	FP18-3A-016	1262000	18320	14820	67.2725	2.0202	0.806673	1.48699
18	FP18-3A-017	980000	1869	1249	529.055	4.0367	0.673727	4.59941
19	FP18-3A-018	1092000	1696	1154	662.047	5.27859	0.676726	5.02216
20	FP18-3A-019	630800	3900	3010	166.968	5.81395	0.773686	4.13437
21	FP18-3A-020	1502000	9020	6990	164.832	3.06243	0.790679	2.78129
26	FP18-3A-021	1261000	12820	10240	103.093	5.36723	0.792679	2.01765
27	FP18-3A-022	1789000	7390	5640	238.9	2.80374	0.76469	2.22222
28	FP18-3A-023	1382000	10200	8100	158.134	3.99018	0.780683	2.30474
29	FP18-3A-024	1387000	34900	27900	49.7021	5.66406	0.803674	1.74129
30	FP18-3A-025	1814000	4890	3331	372.28	2.37288	0.697717	2.86533
31	FP18-3A-026	963000	19400	15980	48.9255	4.16667	0.818668	1.5873
32	FP18-3A-027	1147600	15880	12840	72.9999	2.79255	0.794678	1.63522
33	FP18-3A-028	499700	1130	1300	602.832	14.8148	0.759692	14.4737
34	FP18-3A-029	1453000	6940	5250	210.651	3.31797	0.759692	2.10526
35	FP18-3A-030	1404000	1814	1095	791.156	4.53988	0.609753	5.90164
36	FP18-3A-031	1160000	25430	20630	44.5571	2.17865	0.81467	1.22699
37	FP18-3A-032	1169000	5750	4380	199.779	2.38095	0.76569	2.48042
38	FP18-3A-033	374600	90900	75300	4.03053	1.05973	0.824666	0.812121
39	FP18-3A-034	650700	59940	49620	10.6005	1.8315	0.829364	0.819573
40	FP18-3A-035	610600	72890	60060	8.12901	0.69262	0.821867	0.839212
41	FP18-3A-036	289100	130100	107300	2.18029	2.84951	0.830363	0.830625
42	FP18-3A-037	659000	34410	28480	18.4344	2.36967	0.820667	1.58343
43	FP18-3A-038	924800	13260	10740	68.4374	2.2695	0.801675	2.24439
44	FP18-3A-039	683000	37180	30490	17.9296	1.13698	0.821667	1.3382
45	FP18-3A-040	887000	10730	8570	82.1249	3.30969	0.799676	2
50	FP18-3A-041	449000	69810	57590	6.32925	3.06748	0.826365	0.991896
51	FP18-3A-042	438100	103310	85050	4.1276	1.29351	0.823866	0.800777
52	FP18-3A-043	422600	129600	106500	3.15977	1.19816	0.821667	0.790754
53	FP18-3A-044	438900	100180	82720	4.26448	1.25199	0.826465	0.749879
54	FP18-3A-045	540700	59890	49350	8.82406	1.54015	0.823366	0.837684
55	FP18-3A-046	285200	94700	77900	2.93553	2.51323	0.824866	0.836161
56	FP18-3A-047	509900	80000	65300	6.31954	3.37942	0.825265	0.847868
57	FP18-3A-048	535700	60300	49400	8.94055	3.04017	0.820967	0.96189
58	FP18-3A-049	311800	2301	1816	132.409	2.85924	0.806673	3.9653
59	FP18-3A-050	421400	7470	5750	54.9441	3.35689	0.782683	4.08685
60	FP18-3A-051	560800	48410	39640	11.4062	2.55319	0.819968	0.999634
61	FP18-3A-052	821100	5270	4100	152.504	2.03692	0.782683	2.80971
62	FP18-3A-053	1277000	9810	7570	155.319	8.125	0.767689	1.95312
Spot size = 150 μm, depth of crater ~23μm.
